# Supplementary material
Source: PubMed Central journal article supplement (PMC6598975)
Supplement: 12250_2016_3903_MOESM1_ESM.pdf [file 12250_2016_3903_MOESM1_ESM.pdf]

## Electronic Supplementary Material

### Characterization of viral entry and infection of quantum dot-labeled grass carp reovirus

Fuxian Zhang<sup>#</sup>, Shicui Yan<sup>#</sup>, Hong Guo, Qingxiu Chen, Qin Fang<sup>✉</sup>

State Key Laboratory of Virology, Wuhan Institute of Virology, Chinese Academy of Sciences, Wuhan 430071, PR China.

Supporting information to DOI: 10.1007/s12250-016-3903-5

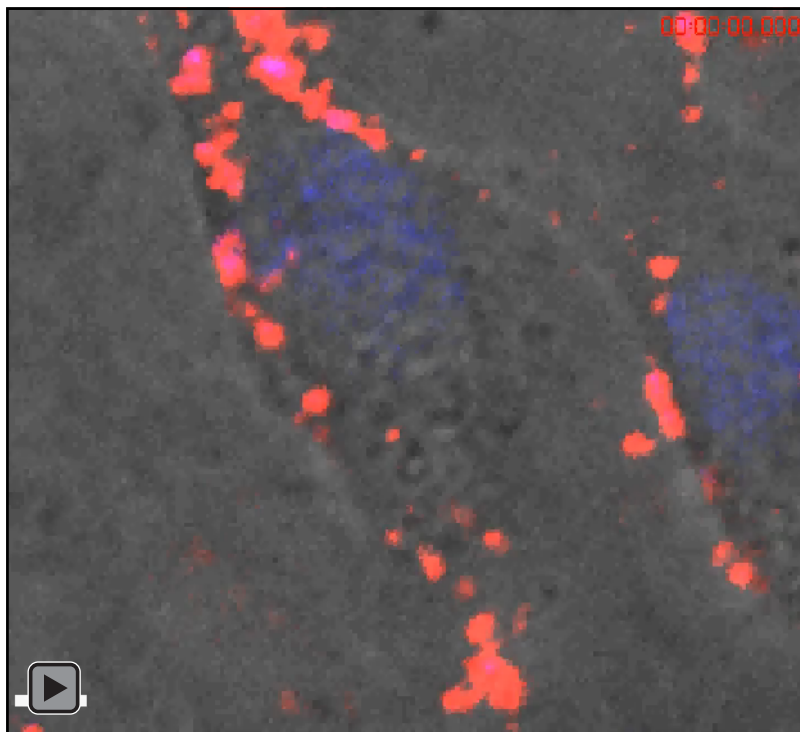

Supplementary Movie S1. *In situ* real-time tracking of QD-GCRVs in living CIK cells. Purified QD-GCRVs were added to CIK cells for incubation at 4 °C for 30 min, and cells were then monitored and analyzed through *in situ* and real-time tracking under a confocal microscope at 28 °C. The QD-GCRVs (red) accumulated around the cell membrane after attachment at 4 °C and were subsequently internalized into the cytoplasm as infection progressed at 28 °C. Scale bars: 3 μm.
